# Supplementary material
Source: PubMed Central journal article supplement (PMC6959128)
Supplement: NIHMS1061023-supplement-tables.pdf [file NIHMS1061023-supplement-tables.pdf]

**Supplement A. Evaluation of longitudinal change in clinical, metabolic, inflammatory, vascular and motor data over 2-year period in all patients with 2-yr follow-up data (n=47)**

|                       | At baseline                           | After 2 years                        | p <sup>‡</sup> |
|-----------------------|---------------------------------------|--------------------------------------|----------------|
| IMT right             | 0.7 ± 0.3, 0.7 (0.3-1.6)              | 1.0 ± 0.3, 1.0 (0.5-1.8)             | <0.001**       |
| IMT left              | 0.8 ± 0.3, 0.7 (0.3-1.8)              | 1.0 ± 0.4, 1.0 (0.5-3.3)             | <0.001**       |
| PI right <sup>‡</sup> | 1.0 ± 0.9, 0.8 (0.2-5.0)              | 1.6 ± 1.1, 1.2 (0.2-5.1)             | <0.001**       |
| PI left <sup>‡</sup>  | 0.9 ± 0.4, 0.8 (0.2-2.1)              | 1.5 ± 0.7, 1.2 (0.2-3.2)             | <0.001**       |
| RI right <sup>‡</sup> | 0.6 ± 0.4, 0.5 (0.1-2.4)              | 0.9 ± 0.6, 0.7 (0.2-2.5)             | <0.001**       |
| RI left <sup>‡</sup>  | 0.6 ± 0.3, 0.6 (0.1-1.3)              | 0.9 ± 0.4, 0.7 (0.2-2.0)             | <0.001**       |
| QRISK2                | 14.3 ± 9.5, 13.1 (1.5-42.5)           | 15.7 ± 10.5, 12.8 (1.7-41.6)         | 0.005**        |
| Uric acid (µmol/l)    | 260.1 ± 69.0,<br>256.0 (122.0-430.0)  | 248.3 ± 76.0,<br>241.0 (103.0-446.0) | 0.108          |
| Homocystein (µmol/l)  | 12.5 ± 2.9, 11.9 (7.9-20.7)           | 13.5 ± 5.3, 11.7 (8.3-34.9)          | 0.623          |
| B12 (pg/ml)           | 312.2 ± 122.8,<br>295.0 (121.0-694.0) | 279.4 ± 96.8,<br>266.0 (114.0-578.0) | 0.017**        |
| Folic acid (ng/ml)    | 7.5 ± 3.4, 6.6 (3.6-15.6)             | 6.8 ± 3.1, 6.2 (2.7-18.6)            | 0.062          |
| C3 (g/l)              | 1.2 ± 0.3, 1.1 (0.8-2.9)              | 1.1 ± 0.2, 1.2 (0.6-1.8)             | 0.346          |
| C4 (g/l)              | 0.3 ± 0.1, 0.2 (0.1-0.6)              | 0.3 ± 0.1, 0.2 (0.1-1.2)             | 0.225          |
| Interleukin 6 (pg/ml) | 3.7 ± 2.8, 3.1 (0.2-16.8)             | 3.7 ± 3.6, 2.9 (1.5-21.1)            | 0.067          |
| UPDRS total           | 32.8 ± 15.5, 30.0 (7.0-76.0)          | 42.9 ± 18.2, 46.0 (12.0-80.0)        | <0.001**       |
| UPDRS I               | 1.5 ± 1.7, 1.0 (0.0-8.0)              | 2.5 ± 2.2, 2.0 (0.0-8.0)             | 0.007**        |
| UPDRS II              | 8.7 ± 5.6, 8.0 (0.0-21.0)             | 11.6 ± 6.6, 13.0 (1.0-25.0)          | 0.002**        |
| UPDRS III             | 22.8 ± 10.7, 21.0 (3.0-56.0)          | 28.7 ± 11.6, 29.0 (9.0-52.0)         | <0.001**       |
| ADL                   | 6.8 ± 1.9, 8.0 (1.0-8.0)              | 6.3 ± 2.5, 8.0 (1.0-8.0)             | 0.036*         |
| Barthel index         | 96.2 ± 8.6, 100.0 (60.0-100.0)        | 91.1 ± 12.5, 95.0 (60.0-100.0)       | <0.001**       |

\* Statistically significant result p<0.05 (which did not remain significant after FDR correction)

\*\* Statistically significant result p<0.05 (which remained significant even after correction for multivariate comparisons)

<sup>‡</sup> Values not known in all patients (specifically, PI right, PI left, RI right and RI left was evaluated for 34, 36, 35 and 35 patients, respectively)

<sup>‡</sup> p-values calculated using paired Wilcoxon test

Legend: ADL (activity of daily living score), CN (cognitive normal), IMT (intimomedial thickness), PI (pulsatility index), RI (resistance index), UPDRS (Unified Parkinson's disease rating scale)

**Supplement B. Evaluation of longitudinal change in clinical, metabolic, inflammatory, vascular and motor data over 2-year period in CN patients with 2-yr follow-up data (n=34)**

|                       | At baseline                           | After 2 years                         | p <sup>‡</sup> |
|-----------------------|---------------------------------------|---------------------------------------|----------------|
| IMT right             | 0.7 ± 0.3, 0.6 (0.4-1.6)              | 1.0 ± 0.3, 0.9 (0.5-1.8)              | <0.001**       |
| IMT left              | 0.7 ± 0.3, 0.7 (0.4-1.8)              | 1.0 ± 0.5, 0.9 (0.5-3.3)              | <0.001**       |
| PI right <sup>‡</sup> | 1.0 ± 1.0, 0.8 (0.2-5.0)              | 1.6 ± 1.2, 1.3 (0.2-5.1)              | <0.001**       |
| PI left <sup>‡</sup>  | 1.0 ± 0.5, 0.8 (0.2-2.1)              | 1.4 ± 0.7, 1.2 (0.2-3.2)              | <0.001**       |
| RI right <sup>‡</sup> | 0.6 ± 0.4, 0.5 (0.1-2.4)              | 1.0 ± 0.6, 0.8 (0.2-2.5)              | <0.001**       |
| RI left <sup>‡</sup>  | 0.6 ± 0.3, 0.6 (0.1-1.3)              | 0.9 ± 0.4, 0.7 (0.2-2.0)              | <0.001**       |
| QRISK2                | 13.6 ± 9.5, 11.2 (1.5-40.9)           | 14.7 ± 10.2, 12.4 (1.7-40.8)          | 0.014**        |
| Uric acid (µmol/l)    | 262.3 ± 69.7,<br>261.0 (122.0-420.0)  | 252.4 ± 66.0,<br>246.5 (119.0-381.0)  | 0.270          |
| Homocystein (µmol/l)  | 12.2 ± 2.7, 11.6 (8.4-20.7)           | 12.8 ± 4.7, 11.5 (8.3-34.9)           | 0.791          |
| B12 (pg/ml)           | 319.6 ± 133.2,<br>300.0 (121.0-694.0) | 283.9 ± 100.3,<br>282.5 (114.0-578.0) | 0.038*         |
| Folic acid (ng/ml)    | 7.2 ± 2.7, 6.7 (3.8-14.1)             | 7.3 ± 3.3, 6.5 (3.2-18.6)             | 0.462          |
| C3 (g/l)              | 1.1 ± 0.4, 1.1 (0.8-2.9)              | 1.1 ± 0.2, 1.1 (0.6-1.5)              | 0.351          |
| C4 (g/l)              | 0.3 ± 0.1, 0.2 (0.2-0.6)              | 0.3 ± 0.2, 0.2 (0.1-1.2)              | 0.771          |
| Interleukin 6 (pg/ml) | 3.0 ± 1.5, 2.8 (0.2-7.4)              | 3.5 ± 3.9, 2.1 (1.5-21.1)             | 0.150          |
| UPDRS total           | 32.3 ± 16.7, 27.5 (9.0-76.0)          | 39.8 ± 17.1, 39.5 (12.0-80.0)         | 0.014**        |
| UPDRS I               | 1.3 ± 1.5, 1.0 (0.0-6.0)              | 2.3 ± 2.0, 2.0 (0.0-8.0)              | 0.013**        |
| UPDRS II              | 8.4 ± 5.4, 8.0 (0.0-21.0)             | 10.7 ± 6.4, 10.5 (1.0-25.0)           | 0.044*         |
| UPDRS III             | 22.6 ± 11.7, 21.0 (5.0-56.0)          | 26.7 ± 11.3, 24.5 (9.0-50.0)          | 0.031*         |
| ADL                   | 6.9 ± 2.1, 8.0 (1.0-8.0)              | 6.5 ± 2.4, 8.0 (1.0-8.0)              | 0.219          |
| Barthel index         | 96.3 ± 9.3, 100.0 (60.0-100.0)        | 93.2 ± 11.1, 100.0 (60.0-100.0)       | 0.026*         |

\* Statistically significant result p<0.05 (which did not remain significant after FDR correction)

\*\* Statistically significant result p<0.05 (which remained significant even after correction for multivariate comparisons)

<sup>‡</sup> Values not known in all patients (specifically, PI right, PI left, RI right and RI left was evaluated for 26, 28, 27 and 27 patients, respectively)

<sup>‡</sup> p-values calculated using paired Wilcoxon test

Legend: ADL (activity of daily living score), CN (cognitive normal), IMT (intimomedial thickness), PI (pulsatility index), RI (resistance index), UPDRS (Unified Parkinson's disease rating scale)

**Supplement C. Evaluation of longitudinal change in clinical, metabolic, inflammatory, vascular and motor data over 2-year period in MCI patients with 2-yr follow-up data (n=13)**

|                       | At baseline                          | After 2 years                         | p <sup>‡</sup> |
|-----------------------|--------------------------------------|---------------------------------------|----------------|
| IMT right             | 0.9 ± 0.3, 0.8 (0.3-1.6)             | 1.1 ± 0.3, 1.0 (0.6-1.6)              | 0.002**        |
| IMT left              | 0.8 ± 0.3, 0.7 (0.3-1.4)             | 1.0 ± 0.3, 1.1 (0.7-1.5)              | 0.001**        |
| PI right <sup>‡</sup> | 0.8 ± 0.2, 0.8 (0.3-1.1)             | 1.5 ± 1.0, 1.1 (0.4-3.3)              | 0.012**        |
| PI left <sup>‡</sup>  | 0.8 ± 0.2, 0.8 (0.4-1.1)             | 1.6 ± 0.9, 1.2 (0.8-3.2)              | 0.018**        |
| RI right <sup>‡</sup> | 0.5 ± 0.1, 0.5 (0.2-0.6)             | 0.7 ± 0.3, 0.6 (0.2-1.3)              | 0.012**        |
| RI left <sup>‡</sup>  | 0.5 ± 0.2, 0.6 (0.3-0.7)             | 0.8 ± 0.2, 0.7 (0.6-1.4)              | 0.018**        |
| QRISK2                | 16.1 ± 9.5, 15.4 (3.0-42.5)          | 18.3 ± 11.3, 14.6 (3.0-41.6)          | 0.135          |
| Uric acid (µmol/l)    | 254.2 ± 69.6,<br>247.0 (147.0-430.0) | 237.3 ± 100.0,<br>232.0 (103.0-446.0) | 0.162          |
| Homocystein (µmol/l)  | 13.4 ± 3.4, 13.1 (7.9-17.8)          | 15.2 ± 6.4, 13.6 (8.5-29.2)           | 0.600          |
| B12 (pg/ml)           | 292.8 ± 92.2,<br>245.0 (190.0-527.0) | 267.5 ± 89.8,<br>238.0 (165.0-449.0)  | 0.196          |
| Folic acid (ng/ml)    | 8.1 ± 4.8, 5.4 (3.6-15.6)            | 5.6 ± 2.3, 5.2 (2.7-9.9)              | 0.021**        |
| C3 (g/l)              | 1.2 ± 0.2, 1.2 (0.8-1.5)             | 1.2 ± 0.2, 1.2 (0.9-1.8)              | 0.789          |
| C4 (g/l)              | 0.3 ± 0.1, 0.3 (0.1-0.4)             | 0.2 ± 0.1, 0.2 (0.1-0.4)              | 0.068          |
| Interleukin 6 (pg/ml) | 5.4 ± 4.2, 3.6 (1.5-16.8)            | 4.3 ± 2.9, 3.7 (1.5-12.1)             | 0.124          |
| UPDRS total           | 34.2 ± 12.5, 32.0 (7.0-52.0)         | 51.1 ± 19.1, 55.0 (19.0-80.0)         | 0.001**        |
| UPDRS I               | 2.0 ± 2.2, 1.0 (0.0-8.0)             | 3.1 ± 2.7, 3.0 (0.0-7.0)              | 0.235          |
| UPDRS II              | 9.8 ± 6.2, 8.0 (2.0-18.0)            | 13.8 ± 7.0, 14.0 (1.0-25.0)           | 0.004**        |
| UPDRS III             | 23.2 ± 7.9, 23.0 (3.0-35.0)          | 34.0 ± 11.1, 31.0 (18.0-52.0)         | 0.002**        |
| ADL                   | 6.8 ± 1.2, 7.0 (5.0-8.0)             | 5.7 ± 2.7, 8.0 (1.0-8.0)              | 0.067          |
| Barthel index         | 95.8 ± 6.7, 100.0 (80.0-100.0)       | 85.4 ± 14.4, 85.0 (60.0-100.0)        | 0.007**        |

\* Statistically significant result p<0.05 (which did not remain significant after FDR correction)

\*\* Statistically significant result p<0.05 (which remained significant even after correction for multivariate comparisons)

<sup>‡</sup> Values not known in all patients (specifically, PI right, PI left, RI right and RI left was evaluated for 8 patients)

<sup>‡</sup> p-values calculated using paired Wilcoxon test

Legend: ADL (activity of daily living score), CN (cognitive normal), IMT (intimomedial thickness), PI (pulsatility index), RI (resistance index), UPDRS (Unified Parkinson's disease rating scale)

## Supplement D. Example calculation of probability of converting to mild cognitive impairment from normal cognition in two years in patients with Parkinson's disease

Probability of cognitive status worsening during 2-year follow-up in patients with Parkinson's disease can be calculated using following formula:

$$\frac{1}{1 + e^{-(2.76 + 0.15*QRISK - 0.012*URIC\_ACID - 0.381*ADL)}}$$

For example, for a patient with QRISK=34.2, URIC\_ACID=259 and ADL=7 the probability will be:

$$\frac{1}{1 + e^{-(2.76 + 0.15*34.2 - 0.012*259 - 0.381*7)}} = 0.891$$

It means that the patient has 89.1% probability of worsening of cognitive status and thus will be classified to the group of patients with high risk of cognitive status impairment during time.
